# Supplementary figures and images for: Global Long Noncoding RNA and mRNA Expression Changes between Prenatal and Neonatal Lung Tissue in Pigs
Source: MDPI journal article supplement (doi:10.3390/genes9090443), 2018-09-05

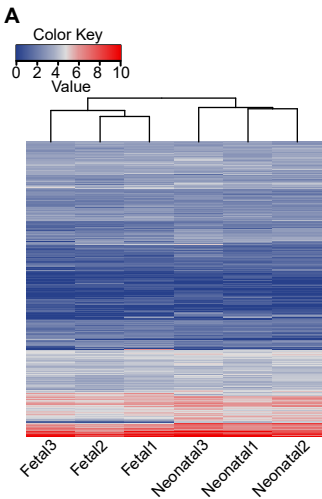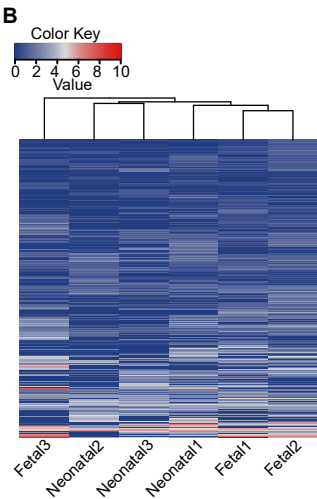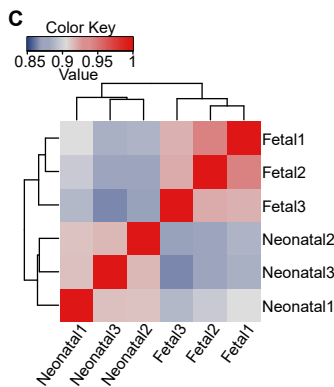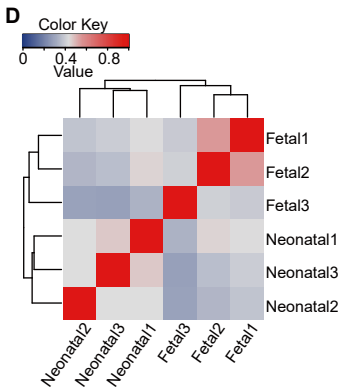

Supplement: s1 [file s1]

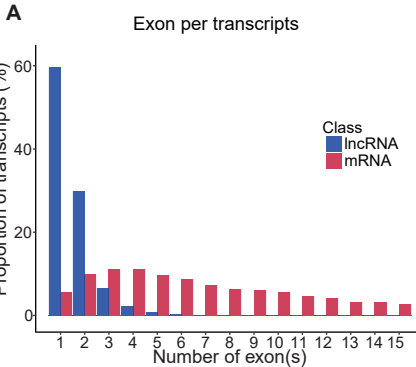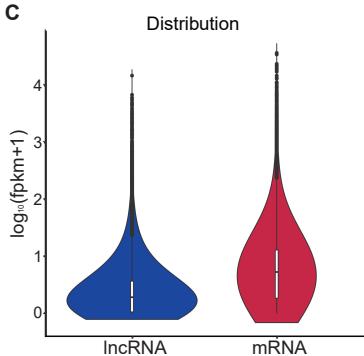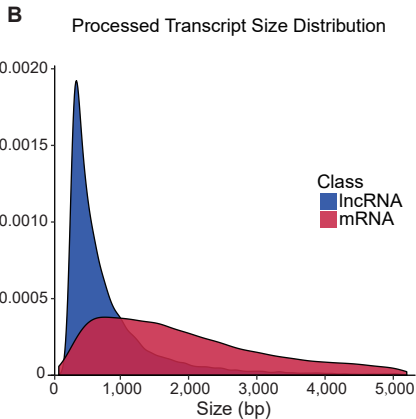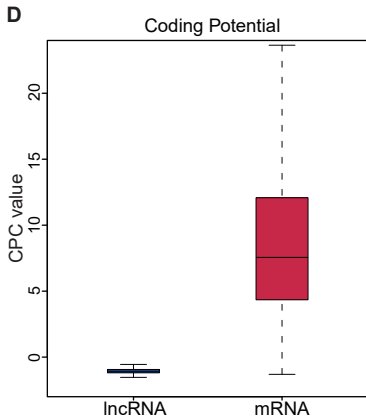

Supplement: s1 [file s1]
